# Supplementary material
Source: publisher figshare collection journal article supplement (https://geolsoc.figshare.com/ndownloader/files/26448097)
Supplement: Supplementary file 1 [file 26448097]

## Sheet: A. Calc-alkaline group
Supplementary material 1
Leat & Riley, Chapter 3.1b
Table 1. Representative analyses of volcanic rocks from the Antarctic Peninsula volcanic arc
A. Represenative analyses of calc-alkaline group rocks from the Antarctic Peninsula volcanic arc
Region	South Shetland Islands	South Shetland Islands	South Shetland Islands	Bisco Is	Graham Land	Graham Land	Graham Land	Graham Land	Graham Land	South Graham Land	South Graham Land	Adelaide Island	Adelaide Island	Adelaide Island	Adelaide Island	Adelaide Island	Adelaide Island	Palmer Land	Palmer Land	Palmer Land	Palmer Land	Palmer Land	Palmer Land	Alexander Island	Alexander Island	Alexander Island	Alexander Island	Alexander Island
Location	Greenwich Island	Fildes Peninsula, King George I.	Byers Peninsula, Livingston I.		Danco Coast	Danco Coast	Danco Coast	Danco Coast	Danco Coast	Cape Berteaux	Cape Berteaux	Milestone Bluff Formation	Milestone Bluff Formation	Mt. Liotard Formation	Mt. Liotard Formation	Reptile Ridge Formation	Reptile Ridge Formation	Mt Edgell	Rhyolite Islands	Batterbee Mts	Goettel Esc	Gurney Pt	Carse Pt	Geode Nuns.	Colbert Mts.	Colbert Mts.	Colbert Mts.	Staccato Peaks
Sample	HA-19.1	990112010	98012301	R.4088.1	O.932.4	O.932.3	O.932.1	O.528.3	O.942.2	R.5401.10	R.5401.1	R.5119.6	R.5189.10	R.5188.10	R.5185.7B	R.5200.6	R.5200.8	KG.1212.5	KG.1202.1	KG.214.10	R.3304.2	KG.520.2	KG.583.1	KG.4404.5A	KG.4388.6	KG.4389.1	KG.4394.2	KG.2717.6
References	1	1	1	2	3	3	3	3	3	2,4	2,4	2	2	2	2	2	2	5	5	2	2	6	6	7	2	2	2	7
Description	Basalt	Basaltic andesite	Andesite	Lava	Lava	Lava	Lava	Rhyodacite	Rhyodacite	Lava	Lava	Lava	Lava	Lava	Lava	Tuff	Lava	Lava	Lava	Scoria	Tuff	Basaltic andesite	Andesite	Lava	Lava	Lava	Lava	Lava
Latitude (S)	62.5194	62.1916	62.6278	66.3667	64.8878	64.8878	64.8878	64.7633	64.8061	68.8917	68.8917	67.6833	67.6642	67.6078	67.6427	67.5333	67.5333	69.4211	69.635	70.7667	70.225	71.008	70.21	69.77	70.7125	70.7153	70.675	71.752
Longitude (W)	59.5833	58.9139	61.0667	67.0833	62.9478	62.9478	62.9478	62.7042	62.8719	67.325	67.325	68.75	68.7387	68.6772	68.5968	68.2	68.2	68.5833	68.495	65.9667	67.2333	67.35	68.117	70.35	70.23	70.23	70.23	70.343
SiO2	56.22	54.16	57.96	49.24	50.27	53.26	54.75	65.62	66.55	53.77	57.14	64.05	49.96	55.89	54.03	65.62	71.03	52.26	74.19	56.31	74.75	51.62	60.48	52.92	60.14	64.6	71	57.4
TiO2	0.45	0.78	1.31	1.07	1.19	1.23	1.11	0.62	0.42	1.75	1.42	0.79	1.04	0.81	0.99	0.6	0.47	0.88	0.09	1.55	0.26	1.33	0.67	0.96	0.93	0.55	0.3	0.81
Al2O3	17.1	19.08	15.07	17.32	14.81	14.01	15.9	14.46	15.28	15.4	23.03	15.7	21.13	16.47	20.66	18.24	14.24	17.07	14.35	17.02	13.36	17.52	16.77	17.44	15.57	16.03	14.23	15.6
Fe203T	7.46	8.94	10.51	8.81	8.75	8.46	8.31	4.31	4.28	11.29	5.85	5.92	9.03	7.2	7.9	4.75	3.28	8.83	2.25	9.14	1.4	8.44	6.05	8.95	5.79	4.7	3.02	7.8
MnO	0.12	0.2	0.19	0.23	0.19	0.19	0.23	0.09	0.08	0.38	0.16	0.13	0.13	0.14	0.12	0.06	0.08	0.13	0.6	0.12	0.08	0.14	0.11	0.15	0.18	0.09	0.08
MgO	4.78	3.7	2.36	8.19	5.61	4.87	4.19	1.23	1.17	3.66	1.05	1.88	4.15	7.05	2.38	0.93	0.52	4.91	0.24	3.74	0.85	4.66	2.48	5.11	1.82	1.56	0.18	6.3
CaO	8.54	8.48	6.42	10.15	9.76	4.32	6.57	2.86	2.79	7.36	3.7	4.37	9.7	7.8	8.25	0.86	2.7	7.38	0.49	6.59	4.01	9.79	6.17	8.63	4.05	4.5	1.45	6.6
Na2O	2.95	3.14	3.72	3.38	4.16	4.45	4.02	4.49	5.38	3.7	3.17	4.32	3.03	3.14	4.07	2.54	3.19	3.08	3.78	3.05	1.33	4.29	3.57	2.88	3	3.66	4.15	2.6
K2O	1.05	0.91	0.66	0.5	0.28	1.73	0.25	2.91	2.33	0.23	2.73	1.43	0.66	0.65	0.41	4.02	1.82	1.24	3.53	1.21	1.54	0.08	2.38	1.2	3.44	2.71	4.23	1.7
P2O5	0.2	0.21	0.39	0.15	0.18	0.17	0.16	0.13	0.1	0.38	0.07	0.37	0.17	0.17	0.23	0.08	0.08	0.29		0.37	0.06	0.16	0.16	0.14	0.3	0.13	0.04	0.14
H2O					3.9	3.93	3.76	1.97	1.51			1.22	0.82	1.18	1.35	2.76	2.75	1.84	0.26	0.69		1.19	0.76	1.23	4.75	1.29	1.55
LOI	1.96	1.29	2.15	0.42						2.51	1.96
Sum	100.83	100.89	100.74	99.46	99.1	96.62	99.25	98.69	99.89	100.43	100.28	100.18	99.82	100.5	100.39	100.46	100.16	97.91	99.78	99.79	97.64	99.22	99.6	99.61	99.97	99.82	100.23	98.95
xrf traces
Cr	31	50	20	351	34	37	38	14	12	14	33	5	26	211	4	34	9	13	1	13	0	40	16	90	22	15	15	80
Ni	5	21	15	144	16	11	10		2	9	15	4	19	68	6	13	5	22	2	25		14	7		6	4	2
Rb	25	23	25	10	8	62	9	135	94	10	112	37	16	21	7	115	60	26	111	36	46		87		141	87	153
Sr	491	593	438	230	285	352	270	295	327	491	449	620	673	608	705	102	182	799	160	621	430	374	713	378	200	297	193	472
Ba	263	280	329		125	397	133	591	648	161	810	596	242	244	226	1026	566	585	906	528	1373	120	836		729	701	1013
Zr	235	100	159	81	207	258	246	424	407	108	189	171	59	120	78	156	223	167	180	235	139	174	293	107	251	173	372	199
Y	26	21	36	25	25	28	28	32	29	31	30	35	20	23	23	24	30	23	26	25	20	28	27	21	31	21	41	25
Nb	5	4.5	3	1	8	11	12	16	16	6	8	5	3	5	3	5	5	12	14	18	9			7	12	8	15	7
La	12.11*	14	18.5*		19	25	24	27	24	0	19.0*	16	6	9	7	10	9	56	37	19	29	2	25		23	21	45
Ce	24.15*	35	40.8*		52	52	53	61	53	29	35.2*	56	29	29	34	34	44	44	63	78	40	16	68		74	37	97
Nd	11.34*	17	25.7*							23	19.7*	34	20	18	26	21	26			45					47	18	53
Pb		9	7	15	27	18	19	28	21	29	9	22	12	10	6	11	16	39	68	7		41	27		15	22	28
Th	5.5*	4.5	5.0*	4	11	11	11	15	25	1	5.2*	2	0	0	0	6	5	28	13	2					9	10	15
* analysis by icp-ms (HA-19.1 & 98012301) or inaa (R.5401.1)
References
1	Machado, A., Chemale, F. Jr., Conceição, R.V., Kawaskita, K., Morata, D., Oteíza, O. & Van Schmus, W.R. 2005. Modeling of subduction components in the genesis of the Meso-Cenozoic igneous rocks from the South Shetland arc, Antarctica. Lithos, 82, 435-543.
2	British Antarctic Survey Geological Database
3	West, S.M. 1974. The geology of the Danco Coast, Graham Land. British Antarctic Survey Scientific Reports, 84, 58pp.
4	P.T. Leat, unpublished data (1992)
5	Davies, T.G. 1984. The Geology of part of northern Palmer Land. British Antarctic Survey Scientific Reports, 103, 46pp.
6	Smith, C.G. 1987. The geology of parts of the west coast of Palmer Land. British Antarctic Survey Scientific Reports, 112, 101pp.
7	McCarron, J.J. & Smellie, J.L. 1998. Tectonic implications of fore-arc magmatism and generation of high-magnesian andesites: Alexander Island, Antarctica. Journal of the Geological Society, London, 155, 269-280.

## Sheet: B. High-Mg andesites
Supplementary material 1
Leat & Riley, Chapter 3.1b
Table 1. Representative analyses of volcanic rocks from the Antarctic Peninsula volcanic arc
B. Analyses of high-Mg andesites from the Antarctic Peninsula volcanic arc
region	Alexander Island	Alexander Island	Alexander Island	Alexander Island	Alexander Island	Alexander Island	Alexander Island	Alexander Island
location	Elgar Uplands	Rouen Mts.	Rouen Mts.	Elgar Uplands	Elgar Uplands	Rouen Mts.	Geode Nuns.	Elgar Uplands
Sample	KG.4417.1C	KG.4323.1	KG.4339.3	KG.2168.2	KG.4400.1	KG.4751.3	KG.4403.5A	KG.4422.3
Reference	1	1	1	1	1	1	1	1
Description	High-Mg andesite lava	High-Mg andesite lava	High-Mg andesite lava	High-Mg andesite lava	High-Mg andesite lava	High-Mg andesite dyke	High-Mg andesite lava	High-Mg andesite lava
Latitude (S)	69.4	69.39	69.39	69.4	69.4	69.39	69.77	69.4
Longitude (W)	70.85	71	71	70.85	70.85	71	70.35	70.85
SiO2	52.78	51.86	54.25	52.95	51.71	57.83	52.73	55.83
TiO2	0.61	0.77	0.74	0.81	0.77	0.61	0.78	0.74
Al2O3	15.1	14.66	14.97	14.1	14.73	14.11	15.57	15.56
Fe203T	7.42	7.82	7.96	8.08	8.56	7.7	8.75	7.35
MnO	0.19	0.13	0.14	0.17	0.15	0.15	0.15	0.12
MgO	8.23	8.63	8.49	7.43	7.73	6.85	7.36	5.86
CaO	7.02	7.24	8.32	9.97	9.14	6.79	9.18	7.85
Na2O	2.34	1.82	2.5	1.8	2.43	1.72	2.59	2.12
K2O	3.87	2.64	1.49	1.66	1.49	1.55	1.45	2.01
P2O5	0.1	0.16	0.2	0.17	0.2	0.12	0.17	0.1
H2O
LOI	2.46	4.75	1.21	3.27	3.5	2.84	1.28	1.91
Sum	100.12	100.48	100.27	100.41	100.41	100.27	100.01	99.45
Mg#	68.9316	68.8234	68.0871	64.7816	64.3669	64.0226	62.7223	61.4618
xrf traces
Cr	310	432	457	489	406	417	301	253
Ni	97	156	159	242	131	112	117	75
Rb	175	93	85	44	36	46	50	53
Sr	251	496	374	374	692	306	384	278
Ba	255	435	273	372	403	191	335	418
Zr	83	116	125	133	113	116	115	127
Y	22	20	22	19	21	18	21	21
Nb	5	5	8	6	5	5	5	6
La	2	12	15	12	25.2*	13	16.5*	16
Ce	20	29	41	49	49*	36	31*	30
Nd	21	17	24	21	28.5*	19	19.3*	11
Pb	10	18	12	18	12	12	15	14
Th	0	4	5	4	0.15*	5	5.05*	5
* analysis by inaa
References
1	McCarron, J.J. & Smellie, J.L. 1998. Tectonic implications of fore-arc magmatism and generation of high-magnesian andesites: Alexander Island, Antarctica. Journal of the Geological Society, London, 155, 269-280.

## Sheet: C. Adakites
Supplementary material 1
Leat & Riley, Chapter 3.1b
Table 1. Representative analyses of volcanic rocks from the Antarctic Peninsula volcanic arc
C. Representative analyses of adakites from the Antarctic Peninsula volcanic arc
Region	South Shetland Islands	South Shetland Islands	South Shetland Islands	Graham Land	Graham Land	Bisco Islands	Bisco Islands	Adelaide Island	Adelaide Island	Graham Land	Graham Land	Palmer Land	Palmer Land	Palmer Land	Palmer Land	Palmer Land
Location	Fildes Peninsula, King George I.	Fildes Peninsula, King George I.	Coppermine Pen. Robert I.	Danco Coast	Danco Coast	Renaud Island	Renaud Island	Buchia Buttress Fm.	Milestone Bluff Fm.	Deschanel Peak	Deschanel Peak	Mount Edgell	Carse Point	Carse Point	Mount Lepus	Sirius Cliffs
Sample	990112001	AF-5	96022302	O.527.2	O.914.1	JB.523.4	JB.560.7	R.5191.4	R.5190.1	R.5402.6	R.5402.12	KG.1212.9	KG.580.10	KG.581.9	R.2451.1	R.2573.1
References	1	1	1	2,3	2	4	4	4	4	4,5	4,5	6	7	7	4	4
Description	Basalt	Basalt	Basalt	Basalt	Basalt	Plag-Pyx-phyric lava	Porphritic lava	Lava	Lava/sill	Lava	Lava	Plag-phyric lava	Basalt lava	Porphritic andesitic lava	Fine-grained andesite	Tuff
Latitude (S)	62.2	62.1889	62.3778	64.7	64.65	65.4397	65.9533	67.4333	67.6727	68.9017	68.9017	69.4211	70.24	70.21	70.65	70.5611
Longitude (W)	58.9333	58.95	59.7	62.65	62.6667	65.3567	66.0133	68.5333	68.6715	67.225	67.225	68.5833	68.217	68.217	67.1	66.95
SiO2	46.91	50.34	49.25	49.63	45.52	47.58	52.32	52.57	61.11	47.86	49.16	52.5	51.23	55.2	62.69	64.25
TiO2	0.62	0.45	0.63	0.68	1.01	0.66	0.94	0.84	0.58	0.48	0.52	0.9	0.72	0.57	0.53	0.74
Al2O3	23.15	20.56	18.09	15.46	17.3	15.4	19.13	18.58	18.21	23.64	24.51	17.24	17.03	16.35	16.57	17.97
Fe203T	8.7	8.43	9.09	8.81	9.29	10.9	8.7	7.4	6.1	4.76	4.89	8.3	8.39	9.61	4.49	4.8
MnO	0.16	0.12	0.16	0.15	0.15	0.28	0.16	0.11	0.17	0.1	0.1	0.14	0.12	0.15		0.12
MgO	4.61	6.15	8.16	10.87	5.58	4.62	4.05	6.17	1.72	1.55	1.68	4.94	7.58	4.73	1.03	1.3
CaO	10.99	10.9	12.85	11.91	12.63	18.19	10.36	7.4	6.26	9.18	9.44	7.04	10.23	5.23	5.53	7.83
Na2O	2.66	2.16	1.93	2	2.03	1.7	3.25	4.17	4.72	3.09	3.26	3.15	2.16	5.68	4.3
K2O	0.51	0.79	0.11	0.34	0.11	0.21	0.43	1.84	0.88	3.57	2.19	1.44	0.16	0.57	1.74	1.34
P2O5	0.09	0.09	0.12	0.1	0.13	0.23	0.24	0.19	0.22	0.08	0.06	0.28	0.08	0.18	0.19	0.09
H2O				1.05	2.82							1.55	0.94	0.68
LOI	2.54	1.78	0.74			0.02	0.42	0.95	0.42	5.78	4.52				1.5
Sum	100.94	101.77	101.13	101	96.57	99.79	100	100.22	100.39	100.09	100.33	97.48	98.64	98.95	98.57	98.44
xrf traces
Cr	13	105	248	211	85	35	22	106	5	32	36	10	162	25		20
Ni	16	6	64	60	22	31	17	56	3	14	17	17	71	14	3
Rb	6	11	2	7		2	7	63	16	120	75	33	3	21	44	35
Sr	672	609	636	446	670	984	644	806	790	848	684	780	466	420	584	641
Ba	263	155	73	88	116	66	132	320	380	2205	531	627	119	260	739	1035
Zr	29	54	20	55	82	11	63	67	101	31	37	171	76	121	131	171
Y	11	10	10	12	12	11	18	21	20	9	9	11	11	10	13	13
Nb	0.4	1	1	<1		3	3	3	3	3	2	7			5	8
La	4	6.24*	5	4	4	0	5	0	16	0	5.4*	26		22	16	20
Ce	12	13.88*	20	14	23	9	12	11	34	0	11.2*	50	11	42	41	0
Nd	9	8.76*	9			16	11	18	27	9	7.5*				32
Pb	3	5	2	3	6	2	0	13	8	9	6	16	38	6	18
Th	3	2.5*	2.5	<1	3	0	0	0	0	0	1.08*	6			0
* analysis by icp-ms (AF-5) or inaa (R.5402.12)
References
1	Machado, A., Chemale, F. Jr., Conceição, R.V., Kawaskita, K., Morata, D., Oteíza, O. & Van Schmus, W.R. 2005. Modeling of subduction components in the genesis of the Meso-Cenozoic igneous rocks from the South Shetland arc, Antarctica. Lithos, 82, 435-543.
2	West, S.M. 1974. The geology of the Danco Coast, Graham Land. British Antarctic Survey Scientific Reports, 84, 58pp.
3	Saunders, A.D., Tarney, J. & Weaver, S.D. 1980. Transverse geochemical variations across the Antarctic Peninsula: implications for the genesis of calc-alkaline magmas. Earth and Planetary Science Letters, 46, 344-360.
4	British Antarctic Survey Geological Database
5	P.T. Leat, unpublished data (1992)
6	Davies, T.G. 1984. The Geology of part of northern Palmer Land. British Antarctic Survey Scientific Reports, 103, 46pp.
7	Smith, C.G. 1987. The geology of parts of the west coast of Palmer Land. British Antarctic Survey Scientific Reports, 112, 101pp.

## Sheet: D. High-Zr group
Supplementary material 1
Leat & Riley, Chapter 3.1b
Table 1. Representative analyses of volcanic rocks from the Antarctic Peninsula volcanic arc
D. Analyses of high-Zr group rocks from the Antarctic Peninsula volcanic arc
Region	Palmer Land	Palmer Land	Palmer Land	Palmer Land	Palmer Land	Palmer Land	Palmer Land	Palmer Land	Palmer Land	Palmer Land	Palmer Land
Location	Procyon Peaks	Procyon Peaks	Procyon Peaks	Procyon Peaks	Procyon Peaks	Procyon Peaks	Procyon Peaks	Procyon Peaks	Procyon Peaks	Procyon Peaks	Procyon Peaks
Sample	KG.556.5	KG.560.2	KG.560.5	KG.556.2	KG.553.1	KG.556.3	KG.554.4	KG.553.2	KG.560.3	KG.560.6	KG.554.2
Reference	1	1	1	1	1	1	1	1	1	1	1
Description†	Benmoreite	Benmoreite	Benmoreite	Trachyte	Trachyte	Trachyte	Trachyte	Trachyte	Trachyte	Trachyte	Trachyte
Latitude (S)	70.47	70.47	70.47	70.47	70.47	70.47	70.47	70.47	70.47	70.47	70.47
Longitude (W)	66.6	66.6	66.6	66.6	66.6	66.6	66.6	66.6	66.6	66.6	66.6
SiO2	56.09	57.03	59.83	61.9	68.43	64.15	62.98	67.36	63.69	64.41	67.03
TiO2	0.87	1.04	0.94	0.72	0.45	0.88	0.68	0.63	0.67	0.7	0.64
Al2O3	16.42	14.42	16.48	18.23	16.44	17.72	15.84	16.29	15.56	15.86	15.83
Fe203T	7.24	6.57	5.24	5.95	2.3	7.84	4.84	3.06	4.57	4.33	2.88
MnO	0.19	0.14	0.11	0.07	0.35	0.1	0.1	0.02	0.12	0.11	0.13
MgO	4.49	4.73	2.7	0.69	0.6	0.83	1.8	0.99	1.77	1.47	0.59
CaO	3.52	5.13	4.86	1.87	1.62	1.25	3.63	2.71	2.8	2.88	1.64
Na2O	5.96	3.49	4.08	5.99	5.54	3.09	4.89	5.58	4.31	4.39	5.24
K2O	0.78	3.07	3.4	1.78	3.48	1.92	2.88	1.58	3.41	3.59	3.75
P2O5	0.18	0.22	0.14	0.21	0.09	0.04	0.18	0.11	0.13	0.13	0.1
H2O	3.08	2.38	1.26	1.6	0.77	1.82	1.46	0.86	1.52	0.12	0.99
LOI
Sum	98.82	98.22	99.04	99.01	100.07	99.64	99.28	99.19	98.55	97.99	98.82
xrf traces
S	21	132	197	39	43	59	29	34	14	25	180
Cr	14	38	20	30	2	13	16		16	16	6
Ni	12	29	11	11	1	4	8		9	9	4
Rb	31	102	142	111	105	98	85	64	123	145	143
Sr	712	553	559	517	307	271	507	332	437	406	315
Ba	609	1256	1532	785	1594	758	1364	797	1558	1507	1639
Zr	455	328	527	398	438	450	462	484	587	625	627
Y	34	23	20	20	28	31	27	35	30	28	40
Nb
La	49	26	28	36	39	49	36		35	42	44
Ce	94	67	56	57	68	95	69		74	94	96
Nd
Pb	41	179	34	45	21	90	39	26	35	36	30
Th
† approximate compositions interpreted by authors
Reference
1	Smith, C.G. 1987. The geology of parts of the west coast of Palmer Land. British Antarctic Survey Scientific Reports, 112, 101pp.
